# Supplementary material for: Highly sensitive refractive index measurement with a sandwiched single-flow-channel microfluidic chip
Source: Royal Society of Chemistry journal article supplement (doi:10.1039/c3ra23119d), 2013-01-01
Supplement: c3ra23119d.pdf [file c3ra23119d.pdf]

## Electronic Supplementary Information

### “Highly Sensitive Refractive Index Measurement with a Sandwiched Single-Flow-Channel Microfluidic Chip”

Kosom Chaitavon,<sup>a,b</sup> Sarun Sumriddetchkajorn,<sup>c</sup> and Jiti Nukeaw<sup>b</sup>

<sup>a</sup>Photonics Technology Laboratory

<sup>c</sup>Intelligent Devices and Systems Research Unit

National Electronics and Computer Technology Center

Pathumthani, Thailand. Fax: +66-2564-6771; Tel: +66-2564-6900

E-mail: sarun.sumriddetchkajorn@nectec.or.th

<sup>b</sup>College of Nanotechnology, King Mongkut’s Institute of Technology Ladkrabang,  
Bangkok, Thailand.

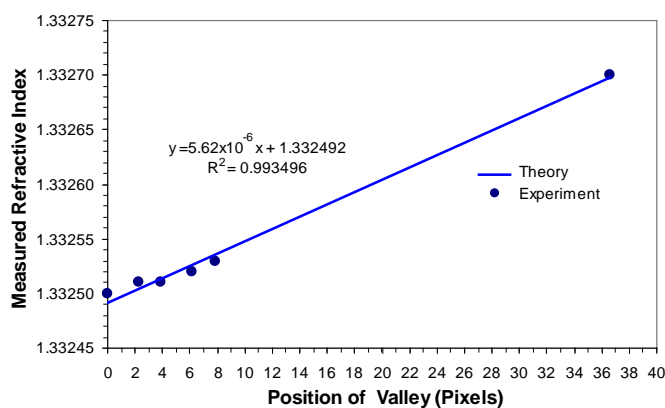

Fig. E1 Plot between the measured refractive index of the PBS solution and the measured valley position.

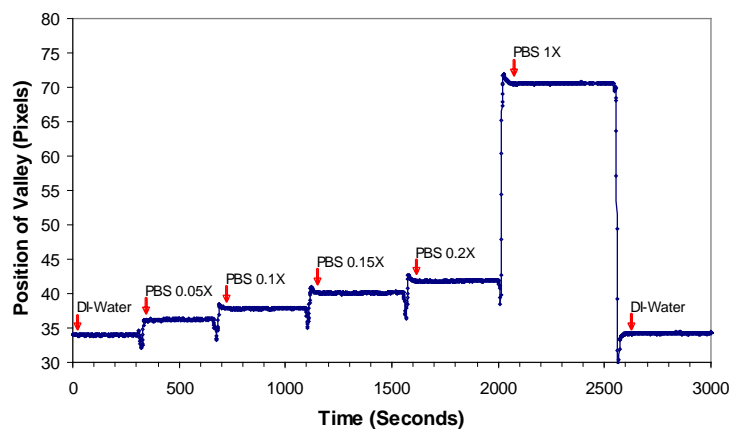

Fig. E2 Change in the measured valley position over time for different PBS concentrations. DI-Water: deionized water.
